# Supplementary material
Source: Copernicus journal article supplement (doi:10.5194/esd-17-795-2026)
Supplement: Supplementary file 1 [file esd-17-795-2026-supplement.pdf]

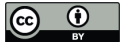

*Supplement of*

## **Deep learning-based chlorophyll prediction: comparison with a dynamic model and applications to fish catch forecasting**

**Ji-Sook Park et al.**

*Correspondence to:* Jong-Yeon Park ([jongyeon.park@jbnu.ac.kr](mailto:jongyeon.park@jbnu.ac.kr)) and Yoo-Geun Ham ([yoogeun@snu.ac.kr](mailto:yoogeun@snu.ac.kr))

The copyright of individual parts of the supplement might differ from the article licence.

# Supplementary

(a)

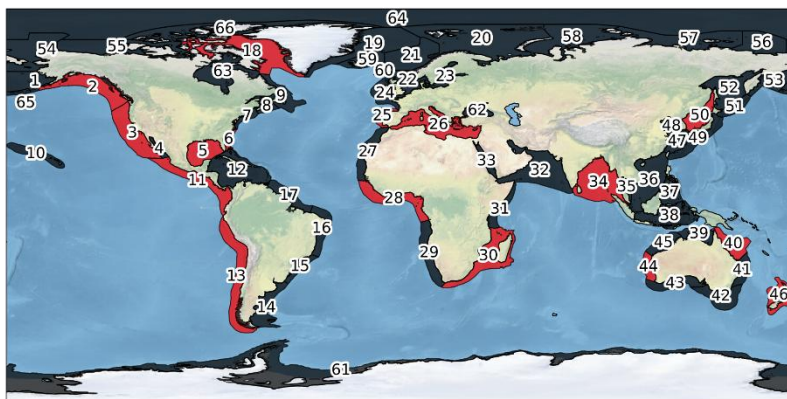

(b)

|    |                                  |    |                         |    |                               |    |                      |
|----|----------------------------------|----|-------------------------|----|-------------------------------|----|----------------------|
| 1  | East Bering Sea                  | 18 | Canadian Eastern Arctic | 35 | Gulf of Thailand              | 52 | Sea of Okhotsk       |
| 2  | Gulf of Alaska                   | 19 | East Greenland Shelf    | 36 | South China Sea               | 53 | West Bering Sea      |
| 3  | California Current               | 20 | Barents Sea             | 37 | Sulu-Celebes Sea              | 54 | Chukchi Sea          |
| 4  | Gulf of California               | 21 | Norwegian Shelf         | 38 | Indonesian Sea                | 55 | Beaufort Sea         |
| 5  | Gulf of Mexico                   | 22 | North Sea               | 39 | North Australian Shelf        | 56 | East Siberian Sea    |
| 6  | Southeast U.S. Continental Shelf | 23 | Baltic Sea              | 40 | Northeast Australian Shelf    | 57 | Laptev Sea           |
| 7  | Northeast U.S. Continental Shelf | 24 | Celtic-Biscay Shelf     | 41 | East-Central Australian Shelf | 58 | Kara Sea             |
| 8  | Scotian Shelf                    | 25 | Iberian Coastal         | 42 | Southeast Australian Shelf    | 59 | Iceland Shelf        |
| 9  | Newfoundland-Labrador Shelf      | 26 | Mediterranean Sea       | 43 | Southwest Australian Shelf    | 60 | Faroe Plateau        |
| 10 | Insular Pacific-Hawaiian         | 27 | Canary Current          | 44 | West-Central Australian Shelf | 61 | Antarctica           |
| 11 | Pacific Central-American         | 28 | Guinea Current          | 45 | Northwest Australian Shelf    | 62 | Black Sea            |
| 12 | Caribbean Sea                    | 29 | Benguela Current        | 46 | New Zealand Shelf             | 63 | Hudson Bay           |
| 13 | Humboldt Current                 | 30 | Agulhas Current         | 47 | East China Sea                | 64 | Arctic Ocean         |
| 14 | Patagonian Shelf                 | 31 | Somali Coastal Current  | 48 | Yellow Sea                    | 65 | Aleutian Islands     |
| 15 | South Brazil Shelf               | 32 | Arabian Sea             | 49 | Kuroshio Current              | 66 | Canadian High Arctic |
| 16 | East Brazil Shelf                | 33 | Red Sea                 | 50 | East Sea                      |    |                      |
| 17 | North Brazil Shelf               | 34 | Bay of Bengal           | 51 | Oyashio Current               |    |                      |

5 **Figure S1. a** Global map of the 66 Large Marine Ecosystems (LMEs) examined in this study. Red shading indicates the 16 LMEs selected for sensitivity analysis, chosen to provide representative coverage across all major ocean basins while excluding polar regions where persistent data gaps limit reliable evaluation. Numbers correspond to LME identifiers referenced throughout the manuscript. **b** List of all 66 LMEs with corresponding identifiers.

**Table S1. Hyperparameter configuration of the CNN model.**

| Parameter            | Value                              |
|----------------------|------------------------------------|
| Convolutional layers | 3                                  |
| Filters per layer    | 35                                 |
| Kernel size          | 3×3                                |
| Max pooling layers   | 2                                  |
| Pooling size         | 2×2                                |
| FC layer neurons     | 50                                 |
| Activation function  | GELU                               |
| Loss function        | MAE                                |
| Optimizer            | Adagrad                            |
| Learning rate        | 0.005                              |
| Batch size           | 32                                 |
| Training epochs      | 135 (early stopping patience = 30) |

15 **Table S2. Summary of datasets used for training, validation, and testing.**

| Dataset                | Samples | Description                            |
|------------------------|---------|----------------------------------------|
| Training               | 8013    |                                        |
| CMIP6 piControl        | 5917    | 16 models $\times$ $\sim$ 370 yrs each |
| CMIP6 historical       | 2096    | 16 models $\times$ $\sim$ 131 yrs each |
| Validation             | 2043    |                                        |
| CMIP6 piControl        | 1483    | 16 models $\times$ $\sim$ 93 yrs each  |
| CMIP6 historical       | 528     | 16 models $\times$ $\sim$ 33 yrs each  |
| GFDL ECDA reanalysis   | 32      | 1965–1997                              |
| Test                   | 23      |                                        |
| Satellite Observations | 23      | 1998–2021                              |
